# Supplementary material
Source: PubMed Central journal article supplement (PMC6318273)
Supplement: 41422_2018_107_MOESM1_ESM.pdf [file 41422_2018_107_MOESM1_ESM.pdf]

Supplementary information, Figure S1

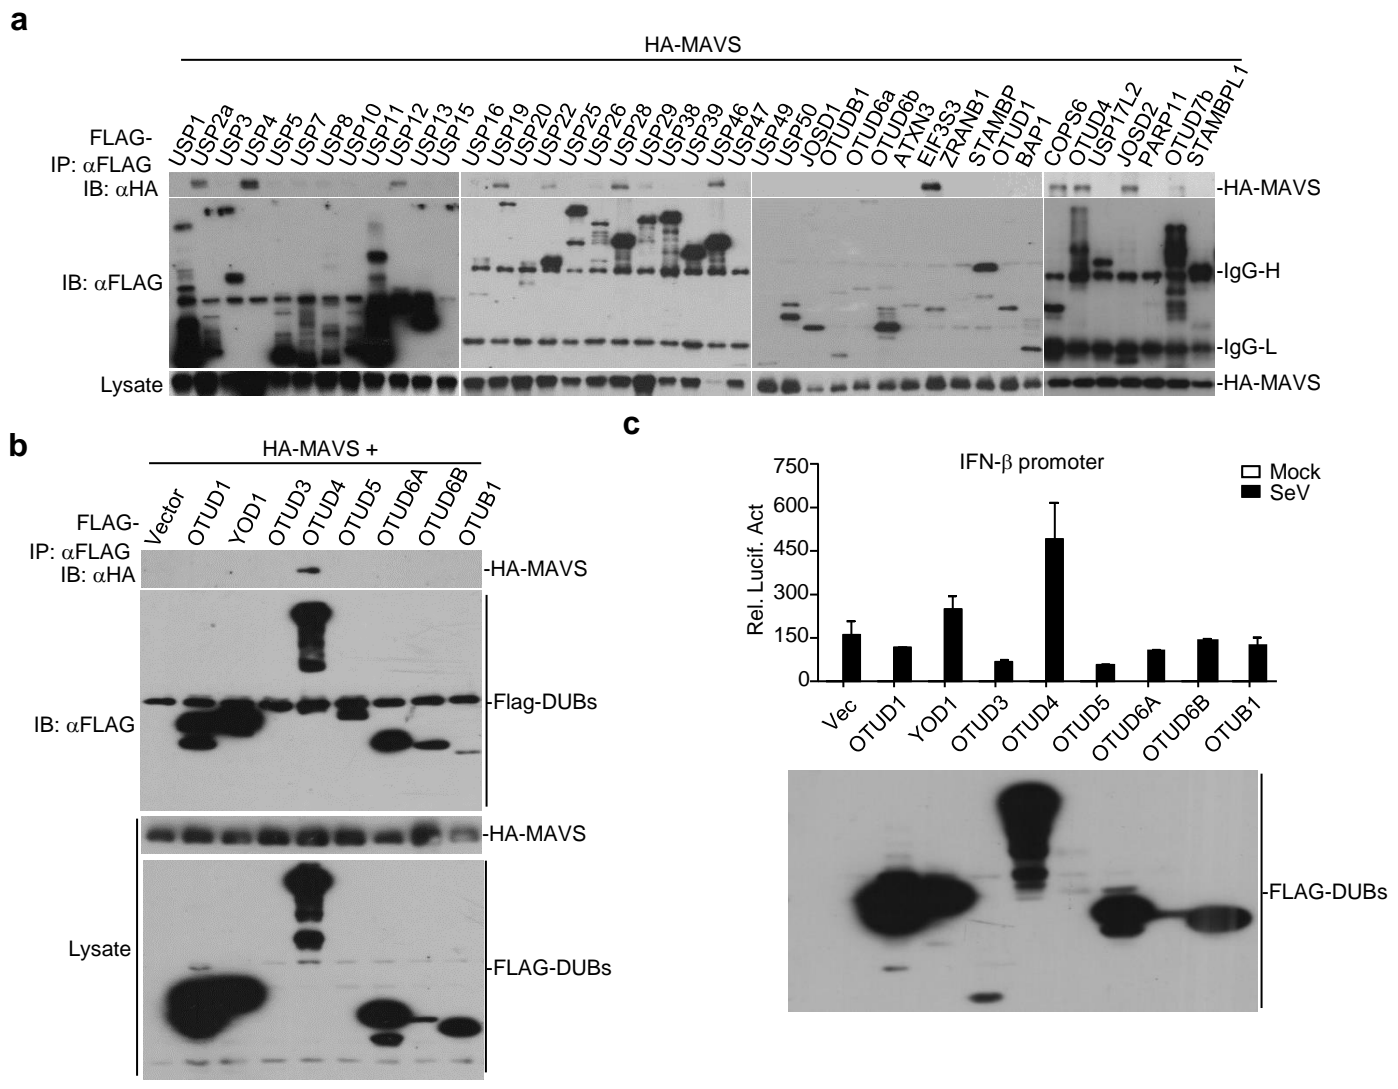

**Supplementary Figure S1. Screening of MAVS-interacting DUBs.**

(a-b) Immunoblot (IB) of HEK293 cells that were transfected to express HA-MAVS and FLAG-tagged OTU family DUBs (OTU domain obtained), lysed and immunoprecipitated (IP) with anti-FLAG. Cell lysate was analyzed by immunoblot with anti-FLAG or anti-HA.

(c) Luciferase reporter assays analyzing IFN-β promoter activity in HEK293 cells transfected with OTU family DUBs for 24 hours followed by infection with SeV for 8 hours.

Data are representative of at least three independent experiments (graphs show mean ± S.D. in c).

Supplementary information, Figure S2

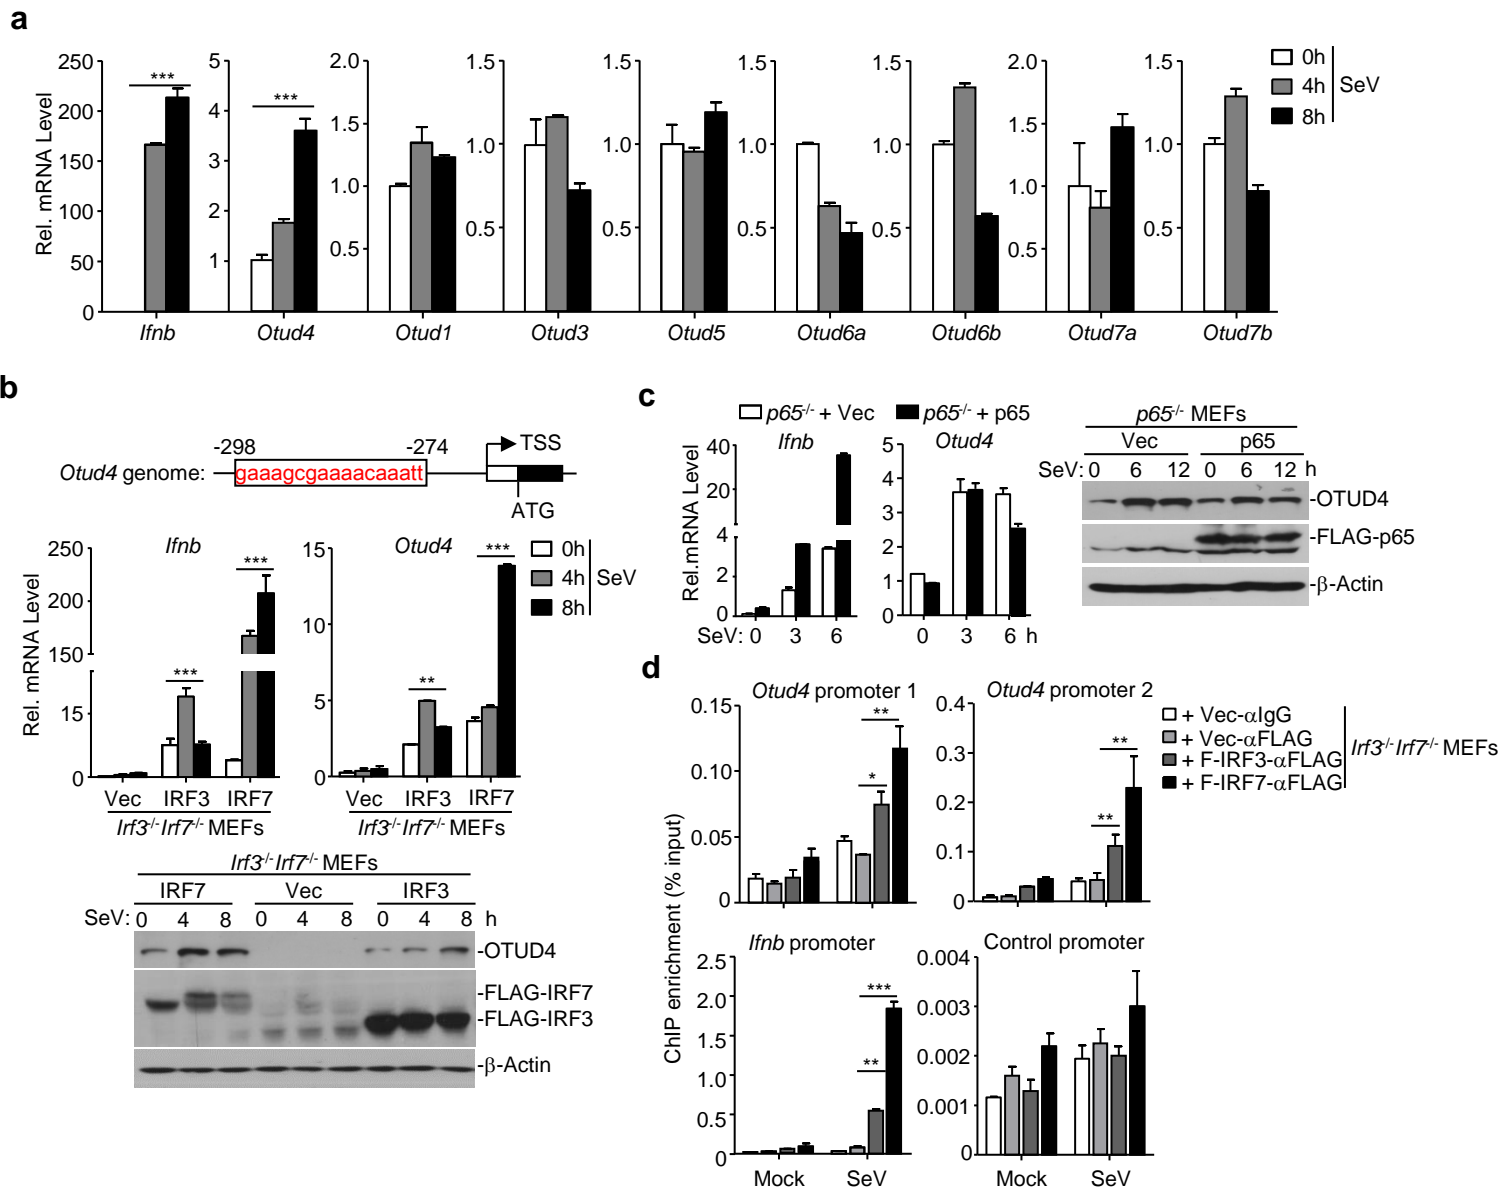

Supplementary Figure S2. Viral infection upregulates the expression of *Otud4* depending on IRF3/7.

(a) qRT-PCR analysis of *Ifnb* or OTU family members mRNA in MEFs infected with SeV for 0-8 hours.  
 (b-c) qRT-PCR analysis of *Ifnb* or *Otud4* mRNA or immunoblot analysis (with anti-FLAG, anti-OTUD4 or anti-β-Actin) in *Irf3*<sup>-/-</sup> *Irf7*<sup>-/-</sup> MEFs reconstituted with empty vector, FLAG-IRF3 or FLAG-IRF7 (b) or *p65*<sup>-/-</sup> MEFs reconstituted with empty vector or FLAG-p65 (c) followed by infection with SeV for 0-12 hours.  
 (d) Chromatin immunoprecipitation (ChIP) (with anti-FLAG or IgG as a control) analysis of the binding of IRF3 or IRF7 on the promoter of *Ifnb* or *Otud4* or on a non-specific control promoter in *Irf3*<sup>-/-</sup> *Irf7*<sup>-/-</sup> MEFs reconstituted with empty vector, FLAG-IRF3 or FLAG-IRF7 followed by SeV infection of 0-4 hours.  
 \*, *P* < 0.05, \*\*, *P* < 0.01 and \*\*\*, *P* < 0.001 (analysis of two-way ANOVA followed by Bonferroni post-test). Data are representative of at least three independent experiments (graphs show mean ± S.D.).

## Supplementary information, Figure S3

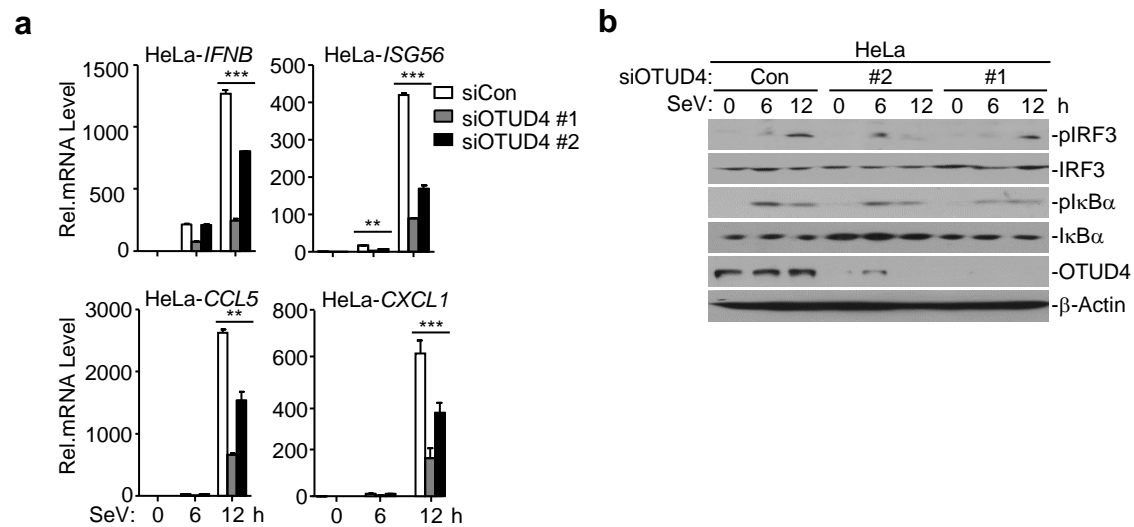

### Supplementary Figure S3. Knockdown of OTUD4 impairs RNA virus-induced phosphorylation of IRF3 and IκBα in HeLa cells.

(a, b) qRT-PCR analysis of *IFNB*, *ISG56*, *CCL5* and *CXCL1* mRNA (a) and immunoblot analysis of total and phosphorylated (p-)IκBα, IRF3, total OTUD4, β-Actin (b) in HeLa cells transfected with control siCon or siOTUD4 (#1 or #2) for 36 hours followed by SeV infection for 0-12 hours.

\*\* $P < 0.01$  and \*\*\* $P < 0.001$  (analysis of two-way ANOVA followed by Bonferroni post-test). Data are representative of three independent experiments (mean  $\pm$  S.D. in a).

# Supplementary information, Figure S4

**a**

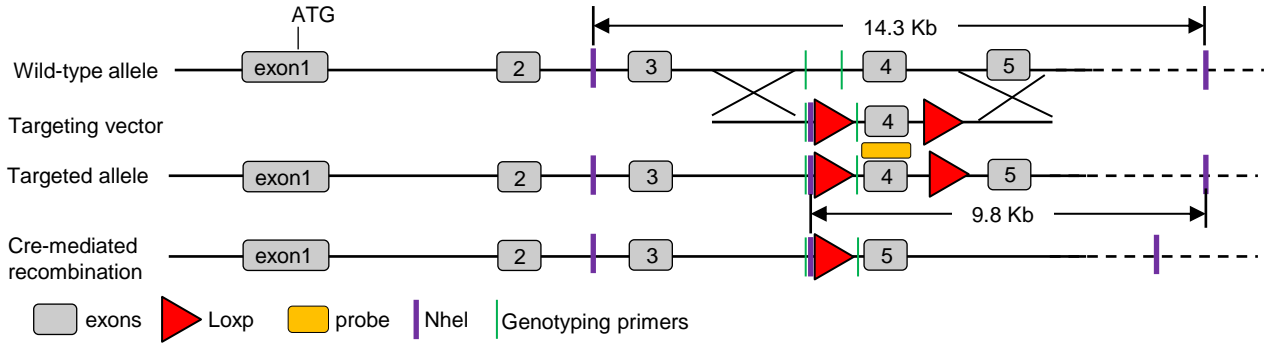

**b**

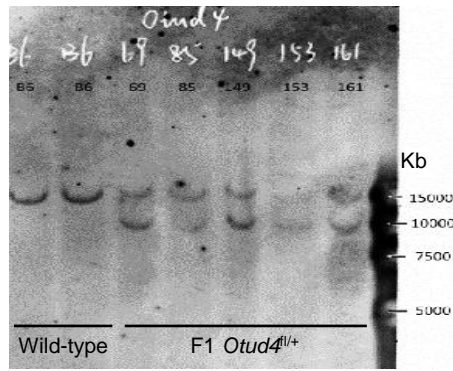

**c**

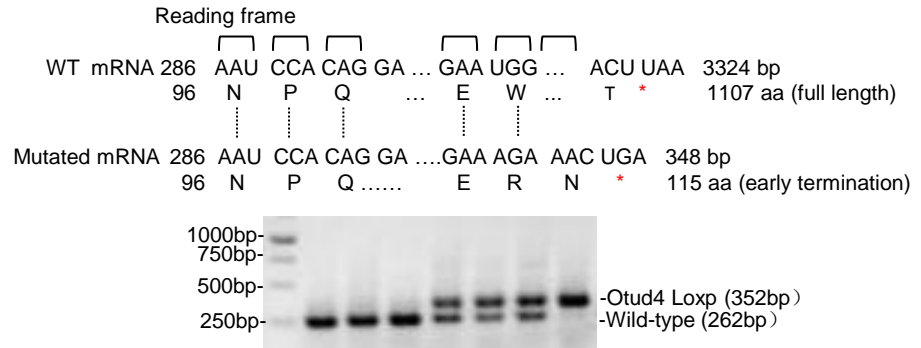

**d**

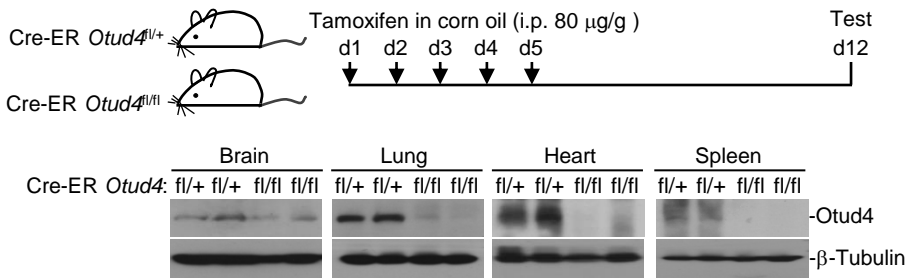

**e**

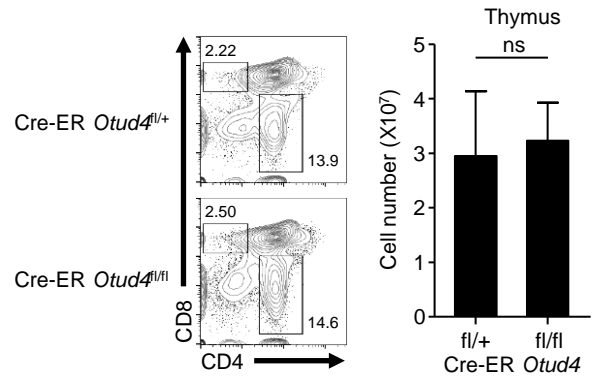

**f**

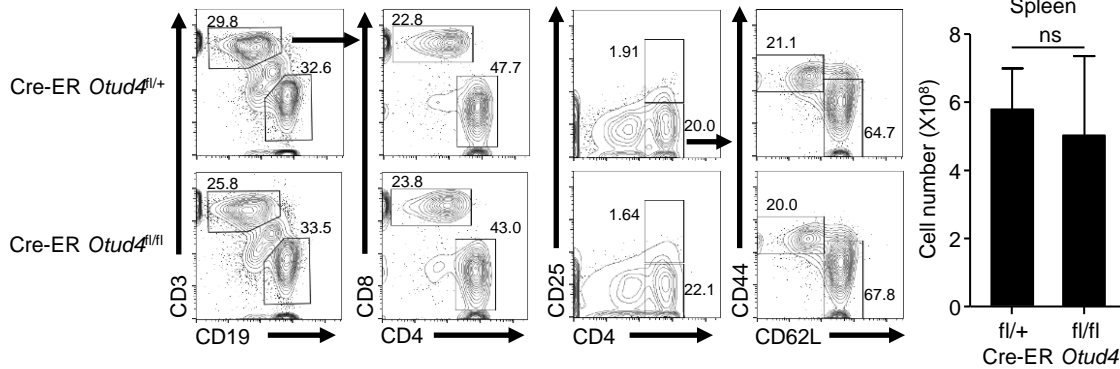

**g**

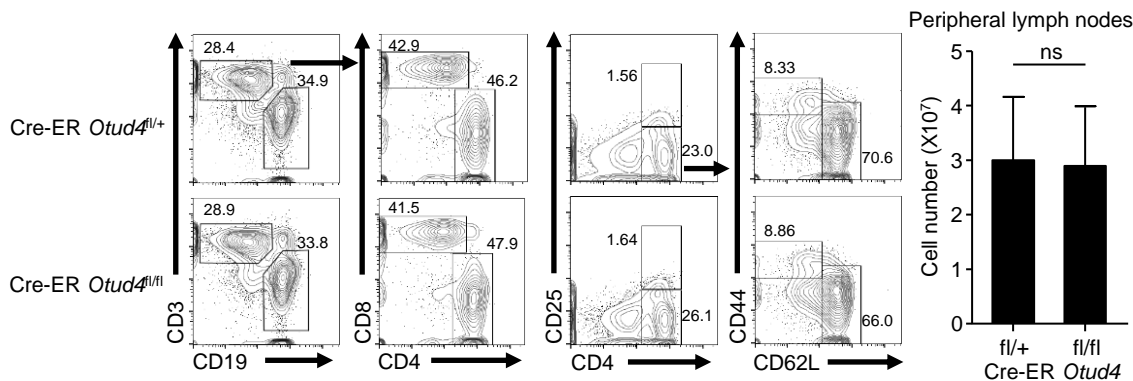

**h**

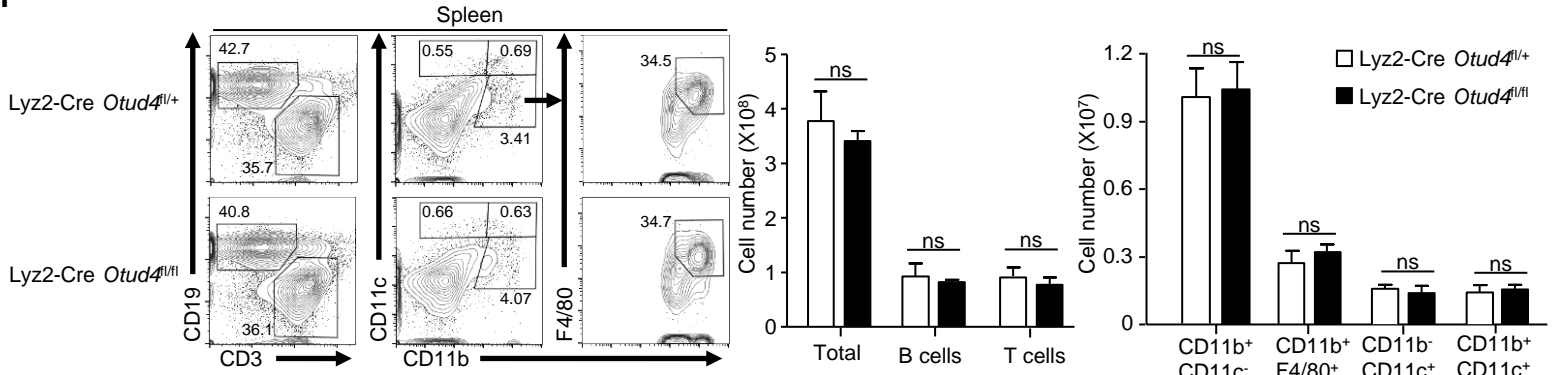

**i**

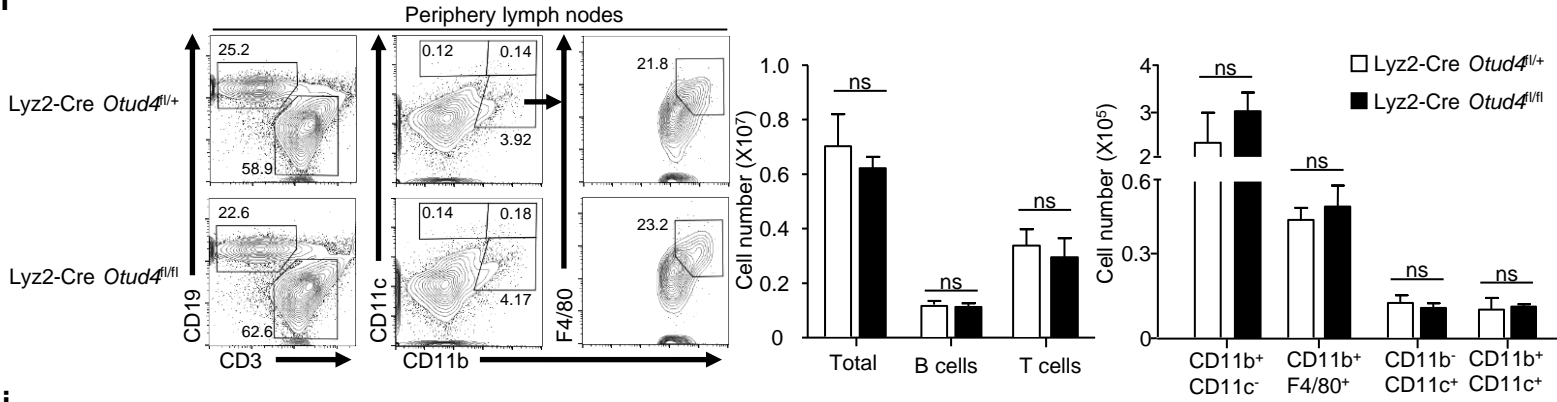

**j**

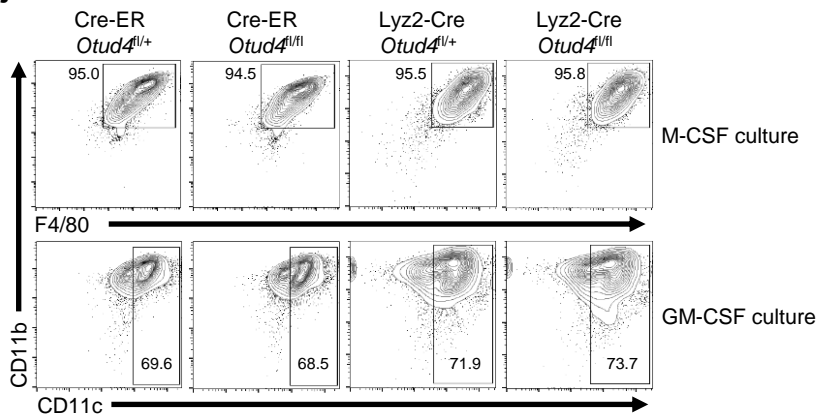

**Supplementary Figure S4. Generation of *Otud4*<sup>fl/fl+</sup> mice.**

(a) A scheme for CRIPSR/Cas9-mediated genome editing of the *Otud4* gene locus.

(b) Southern blot analysis of the generated F1 *Otud4*<sup>fl/fl+</sup> mice.

(c) Genotyping analysis of *Otud4*<sup>fl/fl+</sup>, *Otud4*<sup>fl/fl+</sup> and *Otud4*<sup>fl/fl-</sup> mice.

(d) Immunoblot analysis of OTUD4 and β-Tubulin in brains, lungs, hearts and spleens from Cre-ER *Otud4*<sup>fl/fl+</sup> and Cre-ER *Otud4*<sup>fl/fl-</sup> mice that were intraperitoneally injected with tamoxifen (80 μg/g in corn oil) for 5 successive days and rested for another 7 days.

(e-g) Flow cytometry analysis of lymphocytes composition in the thymus, spleen or peripheral lymph nodes of Cre-ER *Otud4*<sup>fl/fl+</sup> and Cre-ER *Otud4*<sup>fl/fl-</sup> mice (n=3) that were intraperitoneally injected with tamoxifen (80 μg/g in corn oil) for 5 successive days and rested for another 7 days.

(h-i) Flow cytometry analysis of myeloid or lymphocytes in the spleen or peripheral lymph nodes of Lyz2-Cre *Otud4*<sup>fl/fl+</sup> and Lyz2-Cre *Otud4*<sup>fl/fl-</sup> mice (n=3).

(j) Flow cytometry analysis of in vitro generated Cre-ER *Otud4*<sup>fl/fl+</sup> and Cre-ER *Otud4*<sup>fl/fl-</sup> (treated with 4-OH Tam) or Lyz2-Cre *Otud4*<sup>fl/fl+</sup> and Lyz2-Cre *Otud4*<sup>fl/fl-</sup> BMDMs or BMDCs.

Data are representative of two independent experiments (d-j). Graphs show mean ± S.D. (e-i).

# Supplementary Figure S5

**a**

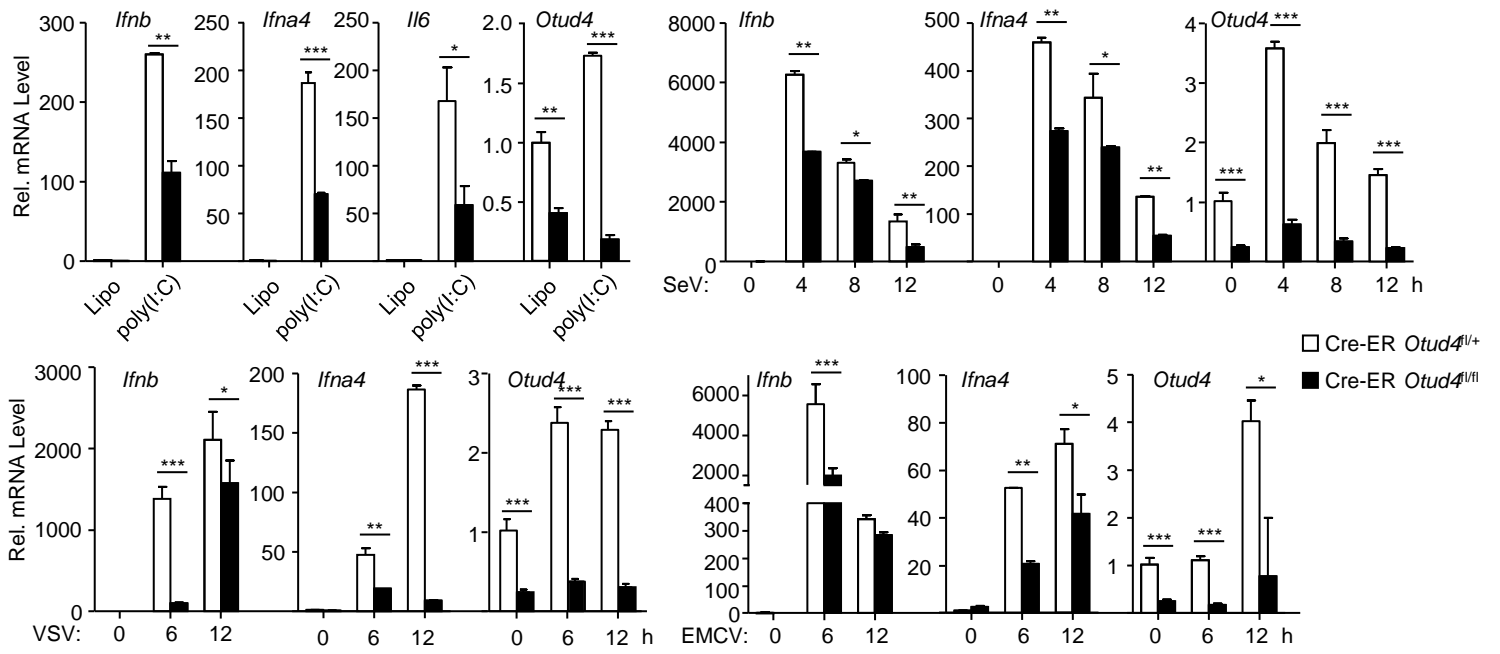

**b**

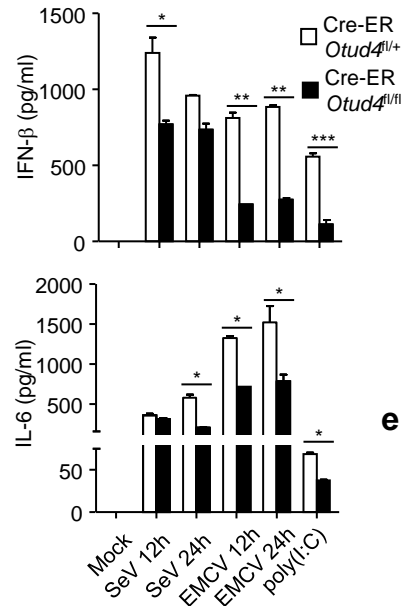

**d**

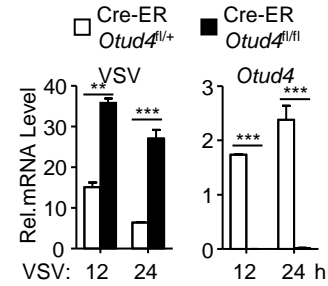

**c**

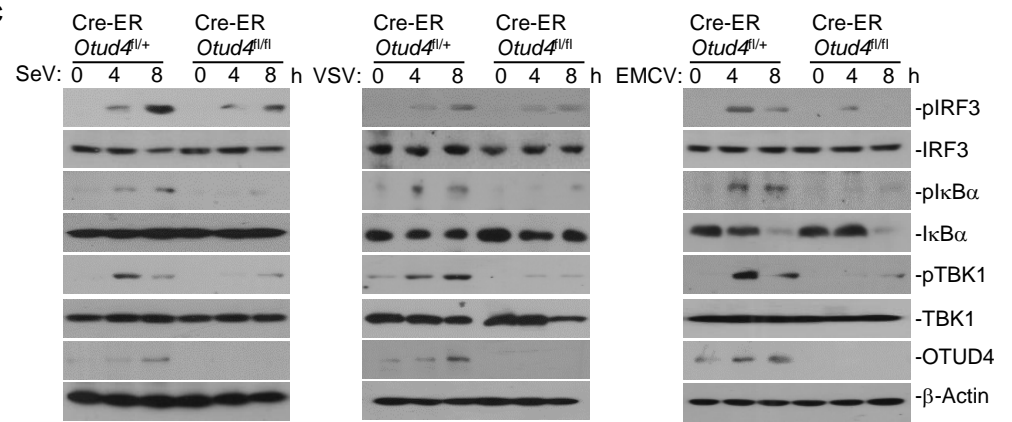

**e**

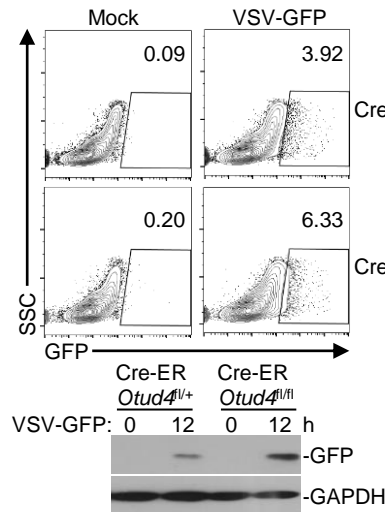

**f**

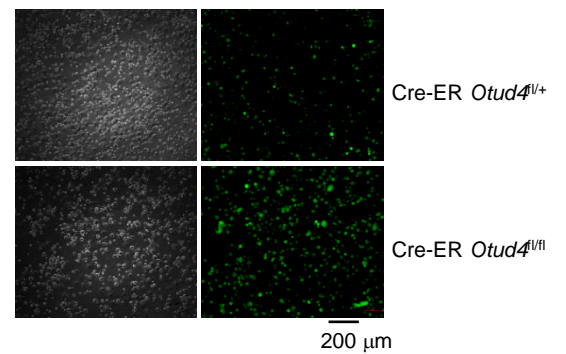

**Supplementary Figure S5. Knockout of OTUD4 inhibits RNA virus-triggered signaling in BMDMs**

(a) qRT-PCR analysis of *Ifnb*, *Iffa4*, *Il6* and *Otud4* mRNA in Cre-ER *Otud4<sup>fl/+</sup>* and Cre-ER *Otud4<sup>fl/fl</sup>* BMDMs (4-OH Tam treated) that were transfected with polyI:C for 3 hours or infected with SeV, VSV or EMCV for 0-12 hours.

(b) ELISA analysis of IFN- $\beta$  and IL-6 in the supernatants of Cre-ER *Otud4<sup>fl/+</sup>* and Cre-ER *Otud4<sup>fl/fl</sup>* BMDMs (4-OH Tam treated) that were transfected with polyI:C for 12 hours or infected with SeV, VSV or EMCV for 12-24 hours.

(c) Immunoblot analysis of total and phosphorylated (p-)TBK1, I $\kappa$ B $\alpha$ , IRF3, total OTUD4,  $\beta$ -Actin in Cre-ER *Otud4<sup>fl/+</sup>* and Cre-ER *Otud4<sup>fl/fl</sup>* BMDMs (4-OH Tam treated) that were infected with SeV, VSV or EMCV for 0-8 hours.

(d) qRT-PCR analysis of VSV-N mRNA in Cre-ER *Otud4<sup>fl/+</sup>* and Cre-ER *Otud4<sup>fl/fl</sup>* BMDMs (4-OH Tam treated) that were infected with VSV for 1 hour followed by twice PBS wash and cultured in full medium for 12 or 24 hours.

(e, f) Flow cytometry and immunoblot analysis (with anti-GFP and anti- $\beta$ -Actin) (e) and fluorescent microscopy imaging (f) of VSV-GFP in Cre-ER *Otud4<sup>fl/+</sup>* and Cre-ER *Otud4<sup>fl/fl</sup>* BMDMs (4-OH Tam treated) that were uninfected or infected with VSV-GFP (MOI=1). Numbers adjacent to the outlined areas indicate percentages of GFP<sup>+</sup> BMDMs.

\*,  $P < 0.05$ , \*\*,  $P < 0.01$  and \*\*\*,  $P < 0.001$  (analysis of two-way ANOVA followed by Bonferroni post-test). Data are representative of three (a-c) or two (d-f) independent experiments (mean  $\pm$  S.D. in a-b, d).

## Supplementary Figure S6

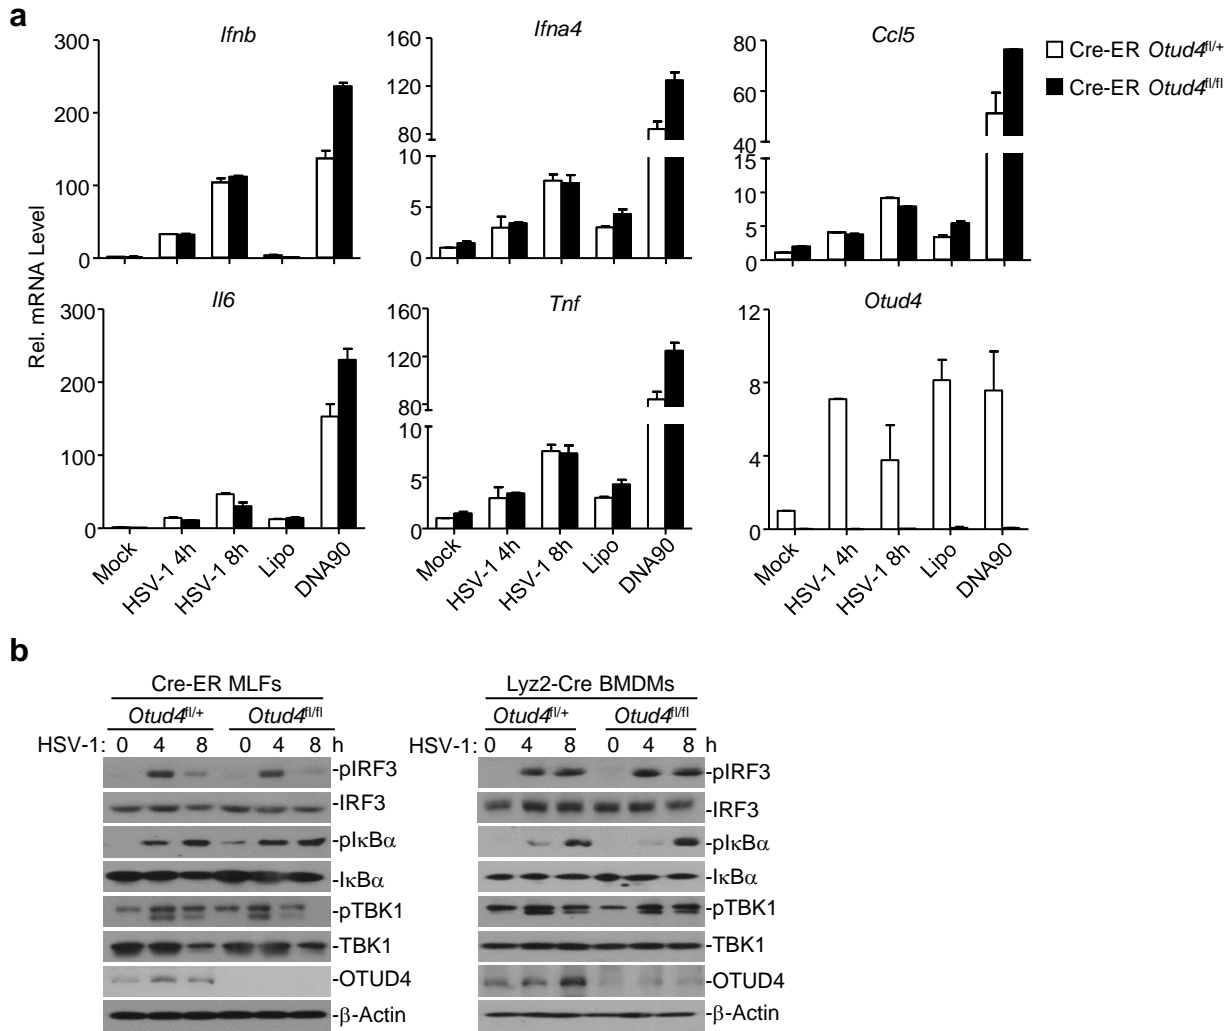

### Supplementary Figure S6. Knockout of OTUD4 has little effects on HSV-1-triggered signaling.

(a) qRT-PCR analysis of *Ifnb*, *Ifna4*, *Ccl5*, *Tnf*, *Il6* and *Otud4* mRNA in Cre-ER *Otud4*<sup>fl/fl+</sup> and Cre-ER *Otud4*<sup>fl/fl-</sup> MLFs (4-OH Tam treated) that were infected with HSV-1 for 0-8 hours or transfected with dsDNA for 3 hours.

(b) Immunoblot analysis of total and phosphorylated (p-)TBK1, IκBα, IRF3, total OTUD4, β-Actin in Cre-ER *Otud4*<sup>fl/fl+</sup> and Cre-ER *Otud4*<sup>fl/fl-</sup> MLFs (4-OH Tam treated) or Lyz2-Cre *Otud4*<sup>fl/fl+</sup> and Lyz2-Cre *Otud4*<sup>fl/fl-</sup> BMDMs that were infected with HSV-1 for 0-8 hours.

Data are representative of three (a) or two (b) independent experiments (mean ± S.D. in a).



# Supplementary information, Figure S7

**a**

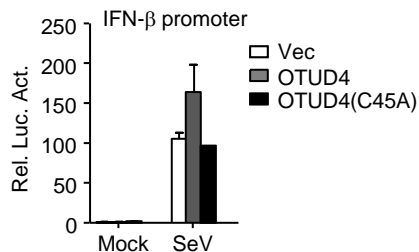

**b**

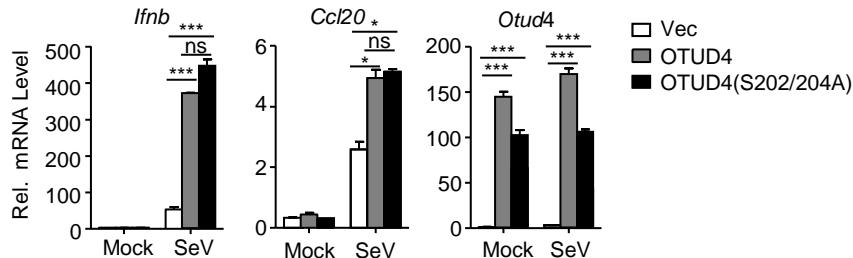

**c**

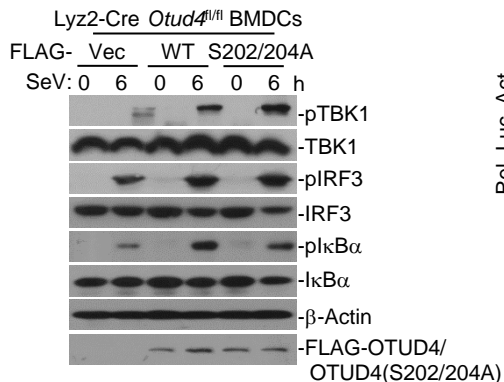

**d**

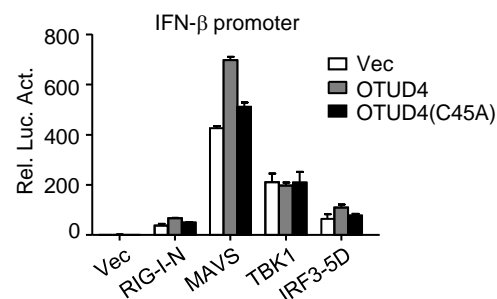

**e**

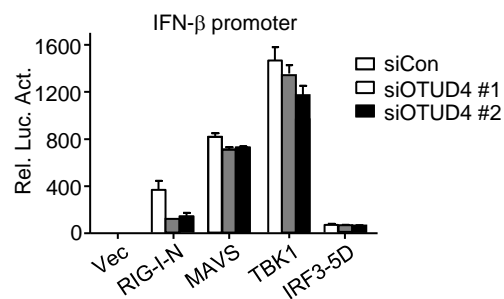

## Supplementary Figure S7. OTUD4 functions at the level of MAVS.

(a) Luciferase reporter assays analyzing IFN-β promoter activity in HEK293 cells transfected with an empty vector (Vec), OTUD4, or OTUD4(C45A) for 24 hours followed by infection with SeV for 8 hours.

(b) qRT-PCR analysis of *Ifnb* and *Otud4* in Lyz2-Cre *Otud4*<sup>fl/fl</sup> BMDCs reconstituted with an empty vector or FLAG-tagged OTUD4 or OTUD4(S202/204A) followed by SeV infection for 0-6 hours.

(c) Immunoblot analysis of total and phosphorylated TBK1, IRF3 and IκBα and β-Actin or FLAG in in Lyz2-Cre *Otud4*<sup>fl/fl</sup> BMDCs reconstituted with an empty vector or FLAG-tagged OTUD4 or OTUD4(S202/204A) followed by SeV infection for 0-6 hours.

(d) Luciferase reporter assays analyzing IFN-β promoter activity in HEK293 cells transfected with plasmids encoding the indicated signaling proteins and Vec, OTUD4 or OTUD4(C45A) for 24 hours.

(e) Luciferase reporter assays analyzing IFN-β promoter activity in HEK293 cells transfected with control siCon or siOTUD4 (#1 or #2) for 12 hours followed by transfection of the plasmids encoding the indicated signaling adaptors for 24 hours.

\*,  $P < 0.05$ , \*\*,  $P < 0.01$  and \*\*\*,  $P < 0.001$  (analysis of two-way ANOVA followed by Bonferroni post-test). Data are representative of three independent experiments (mean ± S.D. in **a-b, d-e**).

## Supplementary information, Figure S8

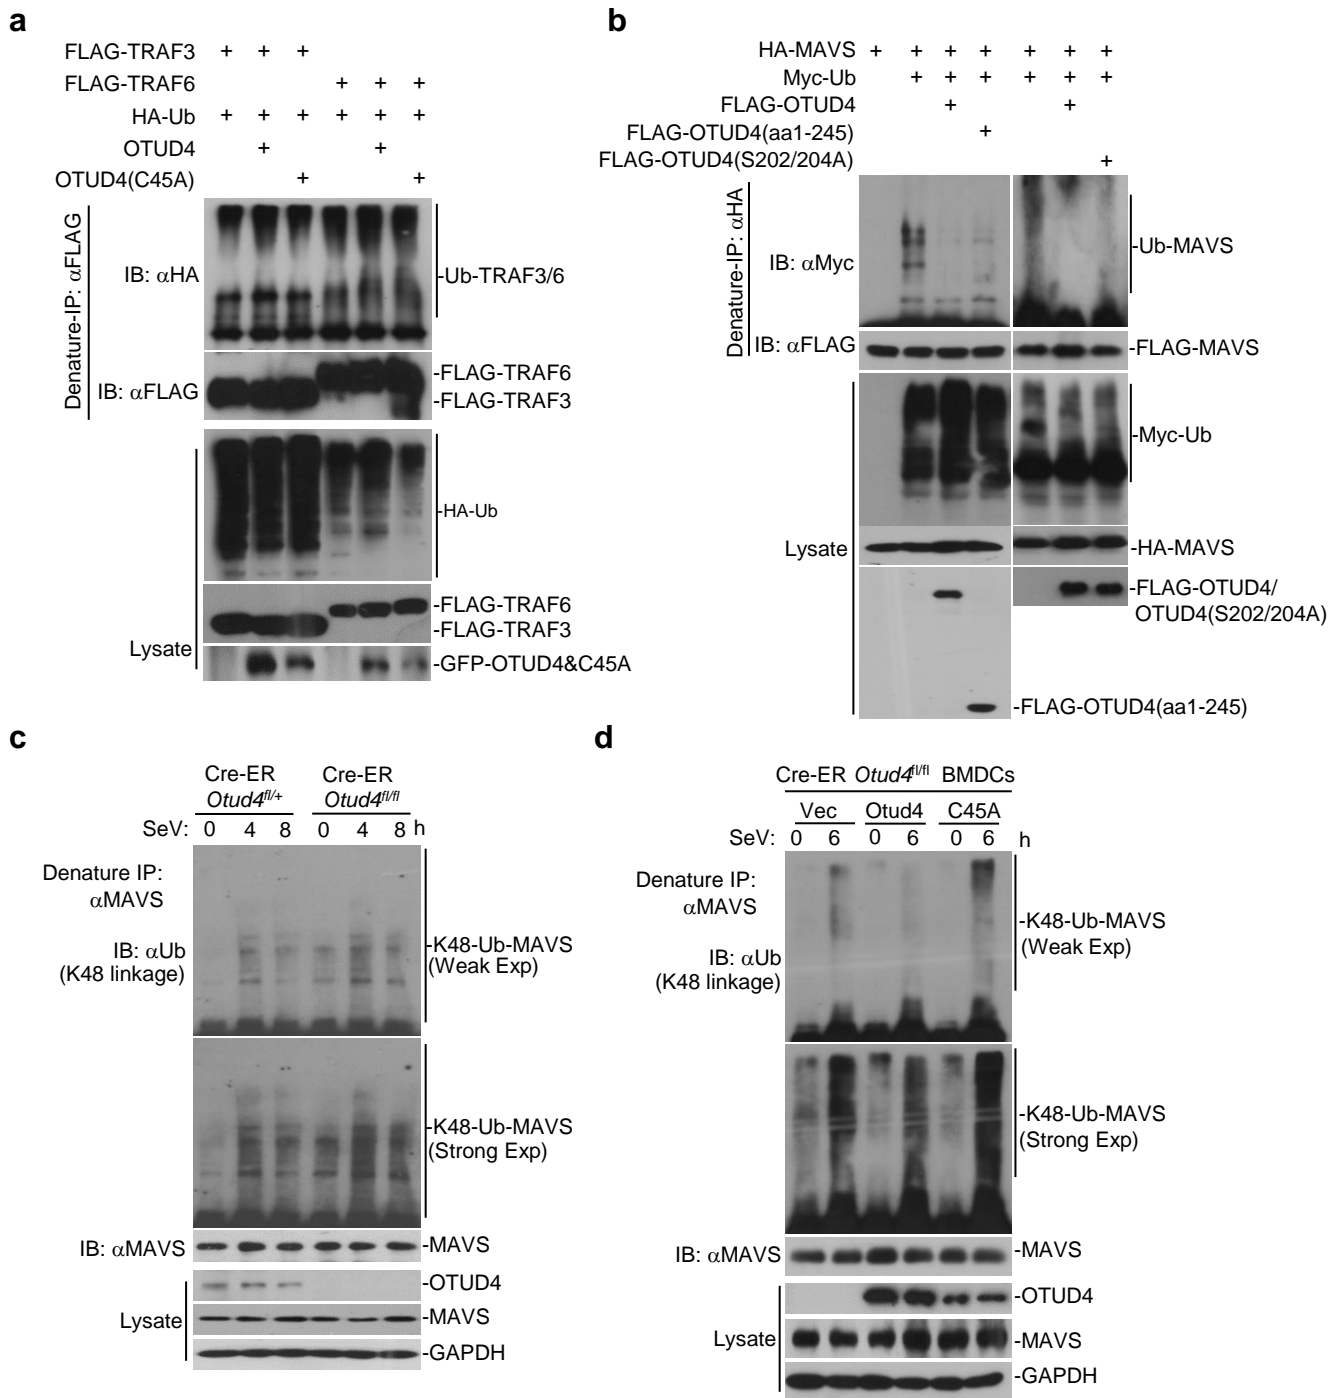

### Supplementary Figure S8. OTUD4 mediates deubiquitination of MAVS.

(a) Denature-immunoprecipitation (Denature-IP) (with anti-FLAG) and immunoblot analysis (IB) (with anti-FLAG, anti-HA or anti-GFP) of HEK293 cells that were transfected to express FLAG-MAVS, HA-Ubiquitin and GFP-OTUD4 or GFP-OTUD4(C45A) for 24 hours.

(b) Denature-immunoprecipitation (Denature-IP) (with anti-HA) and immunoblot analysis (IB) (with anti-FLAG, anti-HA or anti-Myc) of HEK293 cells that were transfected to express HA-MAVS, Myc-Ubiquitin and FLAG-OTUD4, FLAG-OTUD4(aa1-245) or FLAG-OTUD4(S202/204A) for 24 hours.

(c) Denature-IP (with anti-MAVS) and IB (with anti-K48 linkage polyubiquitination, anti-MAVS, anti-OTUD4, anti-GAPDH) of Cre-ER *Otud4*<sup>fl/+</sup> and Cre-ER *Otud4*<sup>fl/fl</sup> BMDCs treated with 4-OH Tam (1  $\mu$ M) for 3 days followed by treatment of MG132 for 2 hours prior to SeV infection for 0-8 hours.

(d) Denature-IP (with anti-MAVS) and IB (with anti-K48 linkage polyubiquitination, anti-MAVS, anti-OTUD4, anti-GAPDH) of Cre-ER *Otud4*<sup>fl/fl</sup> BMDCs (4-OH Tam treated) that were reconstituted with Vec, OTUD4 or OTUD4(C45A) followed by treatment of MG132 for 2 hours prior to SeV infection for 0-6 hours.

Data are representative of three independent experiments.

## Supplementary information, Figure S9

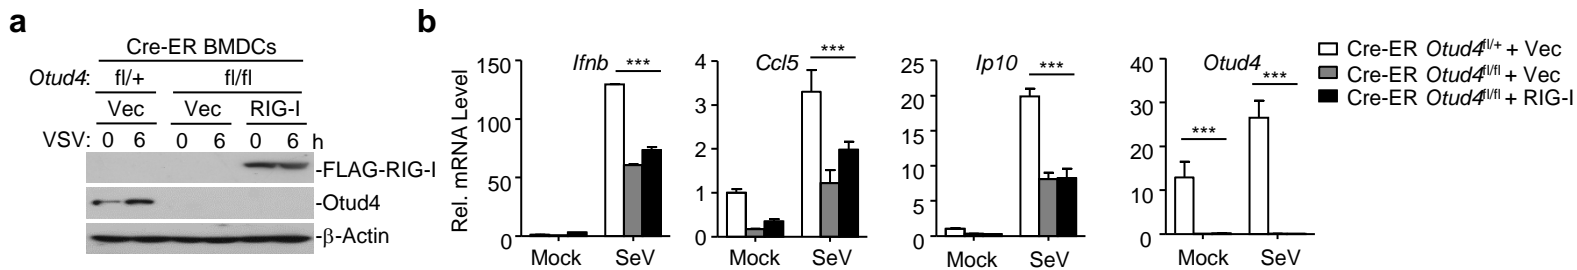

### Supplementary Figure S9. Reconstitution RIG-I into OTUD4 KO cells does not restore SeV-induced expression of downstream genes.

(a) Immunoblot analysis of total FLAG-RIG-I, OTUD4 or  $\beta$ -Actin in Cre-ER *Otud4*<sup>fl/+</sup> and Cre-ER *Otud4*<sup>fl/fl</sup> MLFs (4-OH Tam treated) reconstituted with Vec, or RIG-I followed by infection with SeV for 0-6 hours.

(b) qRT-PCR analysis of *Ifnb*, *Ccl5*, *Ip10* and *Otud4* mRNA in cells obtained in (a) infected with SeV for 0-6 hours.

\*\*\*,  $P < 0.001$  (analysis of two-way ANOVA followed by Bonferroni post-test). Data are representative of three independent experiments (mean  $\pm$  S.D. in **b**).

## Supplementary information, Table S1 Genotyping primer list

| Name                  | Forward sequence (5' to 3') | Reverse sequence (5' to 3') |
|-----------------------|-----------------------------|-----------------------------|
| <i>Otud4</i>          | GTCTCATTCTTGGCCTCGT         | ACATGCTGGCAAACATTCATC       |
| ER <sup>-</sup>       | AAAGTCGCTCTGAGTTGTTAT       | GGAGCGGGAGAAATGGATATG       |
| ER <sup>+</sup>       | AAAGTCGCTCTGAGTTGTTAT       | CCTGATCCTGGCAATTCG          |
| Lyz2-Cre <sup>-</sup> | CTTGGGCTGCCAGAATTTCTC       | TTACAGTCGGCCAGGCTGAC        |
| Lyz2-Cre <sup>+</sup> | CTTGGGCTGCCAGAATTTCTC       | CCCAGAAATGCCAGATTACG        |

## Supplementary information, Table S2 qRT-PCR primer list

| Name             | Forward sequence (5' to 3') | Reverse sequence (5' to 3') |
|------------------|-----------------------------|-----------------------------|
| m $\beta$ -Actin | ACGGCCAGGTCATCACTATT        | TGGCATAGAGGTCTTTACGGA       |
| m <i>Otud4</i>   | GGAGTTAGGATGGCCTGTATC       | GGCACTTATTTCCACTTGTCT       |
| m <i>Ifnb</i>    | TACAACAGATACGCCTGGAT        | AGTCCGCCTCTGATGCTTAA        |
| m <i>Otud1</i>   | GGGTAATGGCACTTTTCACTTT      | CCCAAAGCTATCAGGAAACATC      |
| m <i>Otud3</i>   | TGACATCCCTTTGAGAAGCAC       | AGGGGCATTAAGCTGATGGA        |
| m <i>Otud5</i>   | GGACGGTGCCTGTCTATTTTC       | GCAGTTGTTTTCCGCTTCC         |
| m <i>Otud6a</i>  | AGGGAGCTACAAGCACACATC       | GGCTGTAACCGAATCCACAC        |
| m <i>Otud6b</i>  | AGACGACTTCTGCCGTTTCT        | TGCCTGTAGTATCTCGATTGGT      |
| m <i>Otud7a</i>  | GGCAGACACCATGCTAAGAGA       | TGGACACTAGGGCTGAAAAGTG      |
| m <i>Otud7b</i>  | AGGAGAAGTCAAAGCGAGACC       | ACTGCTTATTCCAGACCCACTC      |
| m <i>Ccl5</i>    | CTGCTGCTTTGCCTACCTCT        | CTTGAACCCACTTCTTCTCTGG      |
| m <i>Ccl20</i>   | AAATCTGTGTGCGCTGATCC        | TTCAACCCAGCTGTGATCA         |
| m <i>Isg15</i>   | GGCCACAGCAACATCTATGA        | ACTGGGGCTTTAGGCCATAC        |
| m <i>Ip10</i>    | GTGAGAATGAGGGCCATAGG        | TTTTTGGCTAAACGCTTTCAT       |
| m <i>Ifna4</i>   | AGGATCACTGTGTACCTGAGA       | TCTCCACACTTTGTCTCAGGA       |
| m <i>Tnf</i>     | ACTGAACCTCGGGGTGATCG        | TCTTTGAGATCCATGCCGTTG       |
| m <i>Il6</i>     | ACAAAGCCAGAGTCTTCAGA        | TCCTTAGCCACTCCTTCTGT        |
| VSV-N            | TGATAGTACCGGAGGATTGACGAC    | CCTTGCAGTGACATGACTGCTCTT    |
| $\beta$ -ACTIN   | CACCATTGGCAATGAGCGGTTT      | AGGTCTTTGCGGATGTCCACGT      |
| IFNB             | TTGTTGAGAACCCTCTGGCT        | TGACTATGGTCCAGGCACAG        |
| CXCL10           | GGTGAGAAGAGATGTCTGAATCC     | GTCCATCCTTGAAGCACTGCA       |
| IL-6             | AGACAGCCACTCACCTTTCAG       | TTCTGCCAGTGCCTCTTTGCTG      |
| ISG56            | TCATCAGGTCAAGGATAGTC        | CCCACTGTATTTGGTGTCTAGG      |
| OTUD4            | CTAACTCCTGCGGTGCCTTCTT      | GCTGAATCAGGTCCAGTGGTCA      |
